# Supplementary material for: The influence of ruthenium substitution in LaCoO3 towards bi-functional electrocatalytic activity for rechargeable Zn–air batteries
Source: Royal Society of Chemistry journal article supplement (doi:10.1039/d0ta06673g), 2020-01-01
Supplement: d0ta06673g1.pdf [file d0ta06673g1.pdf]

## Electronic Supplementary Information

### Influence of Ruthenium Substitution in LaCoO<sub>3</sub> towards Bi-functional Electrocatalytic activity for Rechargeable Zn-Air Battery

Shivaraju Guddehalli Chandrappa,<sup>a,b,c</sup> Prabu Moni,<sup>a,b</sup> Dehong Chen,<sup>c</sup> Guruprakash Karkera,<sup>a,b</sup> Kunkanadu R Prakasha,<sup>a,b</sup> Rachel A. Caruso,<sup>c</sup> and Annigere S. Prakash<sup>\*a,b</sup>

**Table S1.** Crystallographic parameters for LaCo<sub>1-x</sub>Ru<sub>x</sub>O<sub>3</sub> (x = 0.0, 0.2, 0.3 and 0.5) determined from Rietveld refinement of powder x-ray diffraction patterns.

| x   | Space group         | a Å      | b Å      | c Å       | V Å <sup>3</sup> | La (x y z) | Co, Ru (x y z) | O1 (x y z) | O2 (x y z) | R <sub>wp</sub> % | χ <sup>2</sup> |
|-----|---------------------|----------|----------|-----------|------------------|------------|----------------|------------|------------|-------------------|----------------|
| 0   | <i>R</i> $\bar{3}c$ | 5.442(4) | 5.442(4) | 13.099(1) | 336.01           | 0.0000     | 0.0000         | 0.45133    |            | 9.66              | 3.46           |
|     |                     |          |          |           |                  | 0.0000     | 0.0000         | 0.0000     |            |                   |                |
|     |                     |          |          |           |                  | 0.2500     | 0.0000         | 0.25000    |            |                   |                |
| 0.2 | <i>R</i> $\bar{3}c$ | 5.521(4) | 5.521(4) | 13.335(2) | 352.06           | 0.0000     | 0.0000         | 0.45141    |            | 15.0              | 4.63           |
|     |                     |          |          |           |                  | 0.0000     | 0.0000         | 0.0000     |            |                   |                |
|     |                     |          |          |           |                  | 0.2500     | 0.0000         | 0.25000    |            |                   |                |
| 0.3 | <i>R</i> $\bar{3}c$ | 5.528(9) | 5.528(9) | 13.474(6) | 356.71           | 0.0000     | 0.0000         | 0.45756    |            | 12.5              | 4.70           |
|     |                     |          |          |           |                  | 0.0000     | 0.0000         | 0.0000     |            |                   |                |
|     | <i>Pbnm</i>         | 5.565(6) | 5.553(2) | 7.858(8)  | 242.89           | 0.52372    | 0.50000        | 0.53815    | 0.85319    |                   |                |
|     |                     |          |          |           |                  | 0.46324    | 0.0000         | 0.06166    | 0.18651    |                   |                |
|     |                     |          |          |           | 0.25000          | 0.00000    | 0.25000        | 0.01711    |            |                   |                |
| 0.5 | <i>Pbnm</i>         | 5.573(5) | 5.638(0) | 7.886(8)  | 247.83           | 0.51818    | 0.50000        | 0.45180    | 0.77348    | 11.7              | 4.14           |
|     |                     |          |          |           |                  | 0.45521    | 0.00000        | 0.01574    | 0.21758    |                   |                |
|     |                     |          |          |           |                  | 0.25000    | 0.0000         | 0.25000    | 0.05963    |                   |                |

## i) Electrochemical Measurements

The electron transfer number per oxygen molecule ( $n$ ) calculated from Koutecky-Levich (K-L) plots were determined by follow equation:

$$\frac{1}{j} = \frac{1}{j_k} + \frac{1}{B\omega^{1/2}}$$

Where  $j$  is the measured current density,  $j_k$  is the kinetic current density and  $\omega$  is the angular velocity of the disk ( $\omega=2\pi N$ ,  $N$  is the linear rotation speed).

$$B = 0.62nFC_{O_2}(D_{O_2})^{2/3} \gamma^{-1/6}$$

Where,  $n$  represents the overall number of electrons gained per oxygen,  $F$  is the Faraday constant (  $F= 96485 \text{ C mol}^{-1}$  ),  $C_{O_2}$  is the bulk concentration of  $O_2$  ( $1.21 \times 10^{-3} \text{ mol L}^{-1}$ ),  $D_{O_2}$  is the diffusion coefficient of  $O_2$  in 0.1 M KOH electrolyte ( $1.86 \times 10^{-5} \text{ cm}^2 \text{ s}^{-1}$ ),  $\gamma$  is the kinetic viscosity of the electrolyte ( $1.009 \times 10^{-2} \text{ cm}^2 \text{ s}^{-1}$ ).

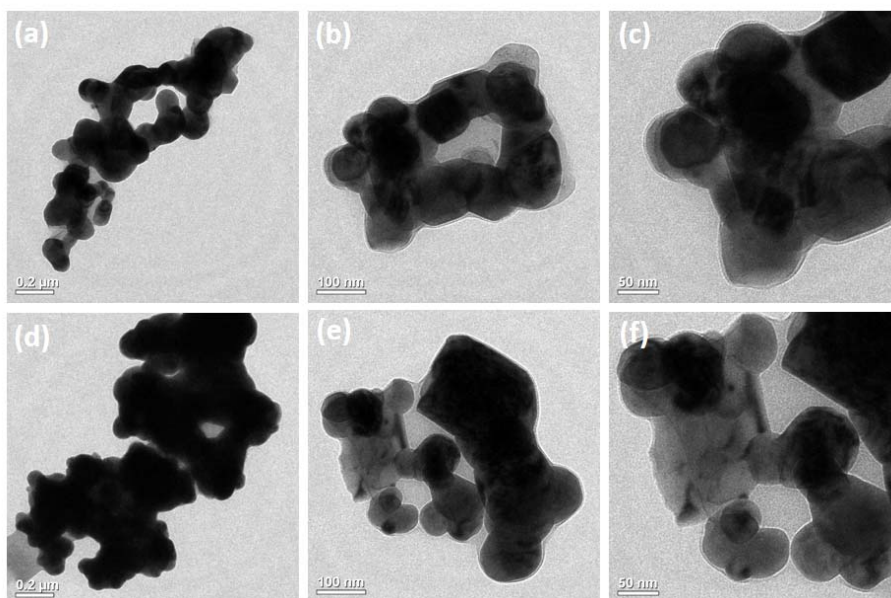

**Fig. S1** TEM images of **(a-c)** LCO and **(d-f)** LCRO82.

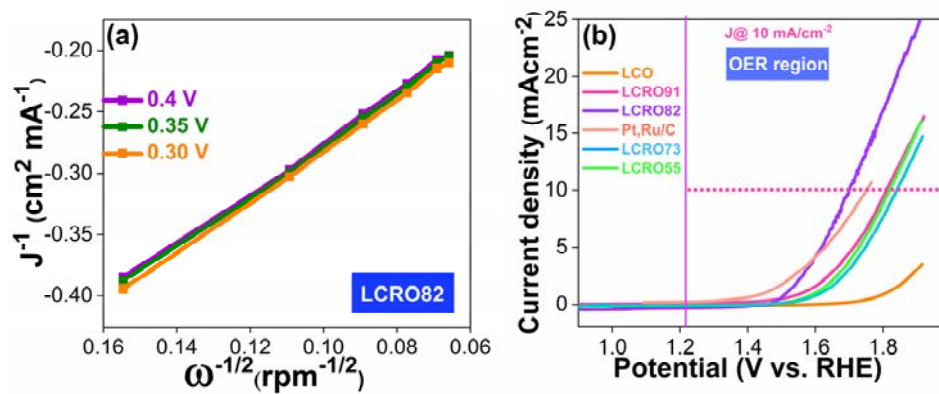

**Fig. S2** (a) K-L plots of the LCRO82 catalyst, (b) OER activity of  $\text{LaCo}_{1-x}\text{Ru}_x\text{O}_{3-\delta}$  ( $x=0, 0.2, 0.3$  and  $0.5$ ) and Pt, Ru/C catalysts. (IR corrected).

**ii) Determination of Oxygen vacancy:**

The oxygen non-stoichiometry ( $\delta$ ) of prepared LCO and LCRO82 catalysts were measured using iodometric titration method (the detailed titration procedures are in the below cited reference) and the amount of oxygen non-stoichiometry ( $\delta$ ) was calculated using the below-mentioned formula.<sup>1</sup>

$$\delta = \frac{(4 - Y)m - M}{2m - 16n} \quad \text{where } n = C \times \Delta V$$

M = Molar mass of the sample

C = Concentration of Na<sub>2</sub>S<sub>2</sub>O<sub>3</sub>

Y = Average valence state of B site

$\Delta V$  = Total consumption

Volume of Na<sub>2</sub>S<sub>2</sub>O<sub>3</sub> solution

m = Sample mass

**Table S2.** Calculated  $\delta$  value of LCO and LCRO82.

| Sample | $\Delta V$ in mL | $\delta$ |
|--------|------------------|----------|
| LCRO82 | 3.6              | 0.31     |
| LCO    | 4.3              | 0.23     |

### iii) XPS data

**Table S3.** XPS binding energy data for LCO and LCRO82 catalysts.

| Sample | La 3d                                                          | Co 2p                                                                                                                                                                                            | O 1s      | Ru 3p                                                                   | Ru 3d                                                                 |
|--------|----------------------------------------------------------------|--------------------------------------------------------------------------------------------------------------------------------------------------------------------------------------------------|-----------|-------------------------------------------------------------------------|-----------------------------------------------------------------------|
| LCO    | 3d <sub>5/2</sub> : 833.57 eV<br>3d <sub>3/2</sub> : 849.86 eV | <b>2 P<sub>3/2</sub></b> :<br>780.91 eV (Co <sup>2+</sup> )<br>779.56 eV (Co <sup>3+</sup> )<br><br><b>2 P<sub>1/2</sub></b> :<br>796.12 eV (Co <sup>2+</sup> )<br>794.71 eV (Co <sup>3+</sup> ) | 528.74 eV | -                                                                       | -                                                                     |
| LCRO82 | 3d <sub>5/2</sub> : 833.82 eV<br>3d <sub>3/2</sub> : 850.07 eV | <b>2 P<sub>3/2</sub></b> :<br>780.49 eV (Co <sup>2+</sup> )<br>779.22 eV (Co <sup>3+</sup> )<br><br><b>2 P<sub>1/2</sub></b> :<br>795.99 eV (Co <sup>2+</sup> )<br>794.72 eV (Co <sup>3+</sup> ) | 528.78 eV | 2 P <sub>3/2</sub> : 464.27 eV<br>and<br>2 P <sub>1/2</sub> : 486.55 eV | 3d <sub>5/2</sub> : 282.48 eV<br>and<br>3d <sub>3/2</sub> : 286.58 eV |

**Table S4.** The relative amounts of different Co species in the LCO and LCRO82 samples (obtained from area under fitted XPS peaks).

| Sample | Co <sup>2+</sup><br>2 P <sub>1/2</sub> |      |      | Co <sup>3+</sup><br>2 P <sub>1/2</sub> |      |      | Co <sup>2+</sup><br>2 P <sub>3/2</sub> |      |       | Co <sup>3+</sup><br>2 P <sub>3/2</sub> |      |       | Co <sup>2+</sup> /Co <sup>3+</sup><br>ratio |
|--------|----------------------------------------|------|------|----------------------------------------|------|------|----------------------------------------|------|-------|----------------------------------------|------|-------|---------------------------------------------|
|        | Peak position                          | FWHM | Area | Peak position                          | FWHM | Area | Peak position                          | FWHM | Area  | Peak position                          | FWHM | Area  |                                             |
| LCO    | 796.69                                 | 3.16 | 6777 | 794.86                                 | 2.06 | 6724 | 781.22                                 | 3.06 | 13532 | 779.62                                 | 1.75 | 13428 | 1.01                                        |
| LCRO82 | 796.07                                 | 3.08 | 6489 | 794.68                                 | 2.10 | 4318 | 780.68                                 | 3.01 | 12957 | 779.31                                 | 1.76 | 8621  | 1.50                                        |

Note: A line shape with 30% Lorentzian ratio was used for peak fitting. FWHM = full width at half maximum.

**Table S5.** The relative amount of the four different surface oxygen species of LCO and LCRO82. (Obtained from area under fitted XPS peaks).

| Sample | O <sup>2-</sup> |      |        | O <sub>2</sub> <sup>2-</sup> /O <sup>-</sup> |      |        | OH <sup>-</sup> /O <sub>2</sub> |      |        | H <sub>2</sub> O |      |        |
|--------|-----------------|------|--------|----------------------------------------------|------|--------|---------------------------------|------|--------|------------------|------|--------|
|        | Peak position   | FWHM | (At.)% | Peak position                                | FWHM | (At.)% | Peak position                   | FWHM | (At.)% | Peak position    | FWHM | (At.)% |
| LCO    | 528.74          | 1.18 | 43.53  | 530.22                                       | 1.69 | 16.16  | 531.28                          | 1.35 | 30.27  | 532.25           | 1.59 | 10.04  |
| LCRO82 | 528.78          | 1.20 | 43.95  | 530.16                                       | 1.82 | 23.57  | 531.31                          | 1.42 | 24.08  | 532.42           | 1.65 | 8.41   |

**Note:** A line shape with 30% Lorentzian ratio was used for peak fitting. FWHM = full width at half maximum.

#### iv) Impedance data collection and analysis

The electrochemical impedance data has been collected at OCV voltage with Pt,Ru/C, LCO and LCRO82 as cathodes in Zinc-air batteries. The impedance data have been analyzed using ZSimpWin version 3.10 software and R(QR)(QR)W equivalent circuit is used for the fitting. **Figure S3**, shows the fitting of impedance data of Pt,Ru/C, LCO and LCRO82 catalysts and the values of fitted parameters are given in **table S6**.

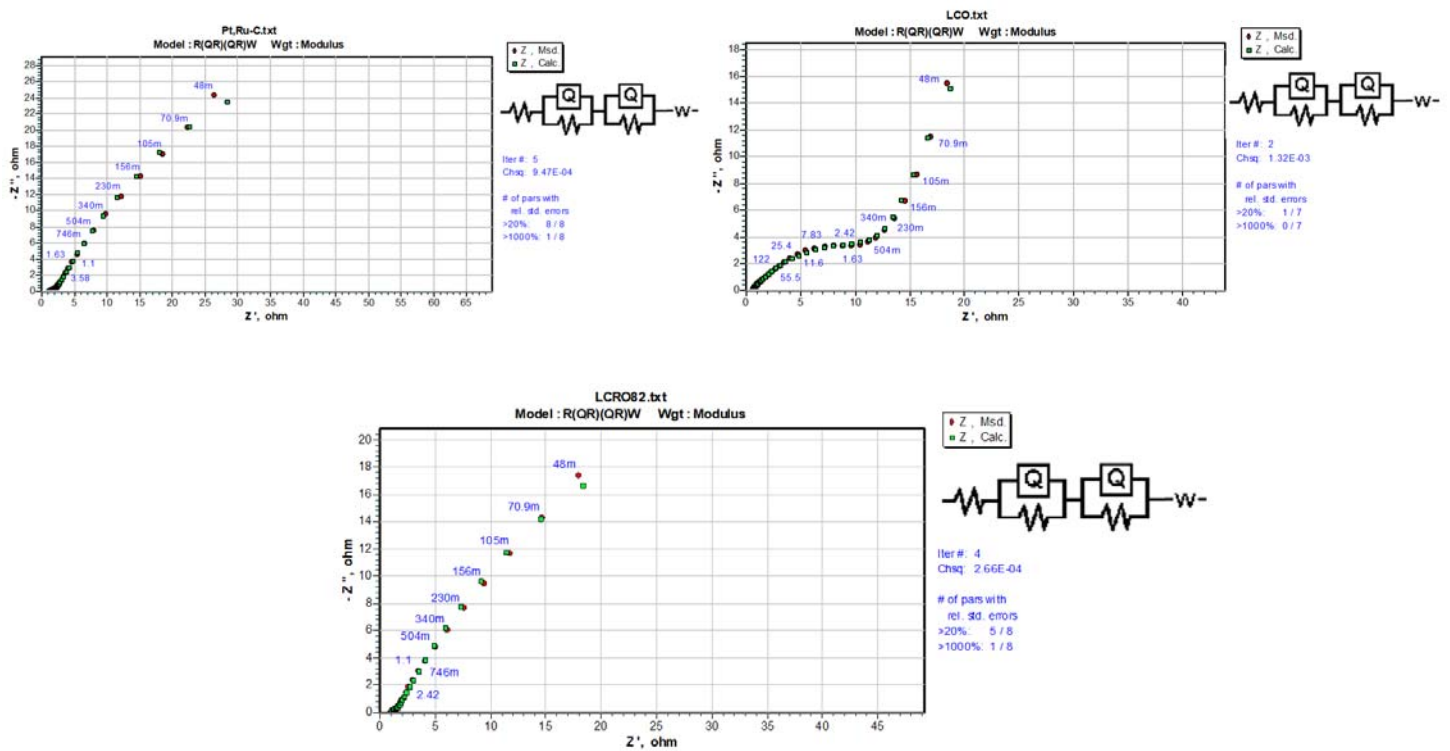

**Fig. S3** Fitted Impedance spectra of Zn-air cell using Pt,Ru/C, LCO and LCRO82 catalysts at OCV voltage.



**Table S6.** Values of the  $R_s$ ,  $R_{int}$  and  $R_{ct}$  obtained by simulated data of an impedance spectrum.

| Sample   | $R_s$ / ohm | $R_1$ / ohm | $R_2$ / ohm |
|----------|-------------|-------------|-------------|
| LCO      | 0.53        | 0.88        | 10.4        |
| LCRO82   | 1.03        | 0.40        | 0.54        |
| Pt, Ru/C | 0.95        | 0.44        | 1.51        |

**Table S7.** Comparison of bi-functional electrocatalytic activity of reported various perovskite electrocatalysts.

| Catalyst                                                                                                   | ORR Performance                | OER performance                 | $\Delta E$ (V) | OER Tafel slope (mV dec <sup>-1</sup> ) | Reference                                                               |
|------------------------------------------------------------------------------------------------------------|--------------------------------|---------------------------------|----------------|-----------------------------------------|-------------------------------------------------------------------------|
| LCRO82                                                                                                     | $E_{j=3} - 0.63$ V vs RHE      | $E_{j=10} - 1.69$ V vs RHE      | 1.06 V vs RHE  | 43                                      | Our work                                                                |
| La <sub>0.9</sub> FeO <sub>3</sub>                                                                         | $E_{j=3} - 0.38$ V vs RHE      | $E_{j=10} - 1.64$ V vs RHE      | 1.26 V vs RHE  | 54                                      | <i>Chem. Mater.</i> 2016, 28, 1691–1697. <sup>2</sup>                   |
| LaNi <sub>0.8</sub> Fe <sub>0.2</sub> O <sub>3</sub> /VC                                                   | $E_{j=3} \approx -0.64$ vs RHE | $E_{j=10} \approx 0.74$ vs RHE  | 1.10 vs RHE    | -                                       | <i>J. Mater. Chem. A</i> , 2015, 3, 9421–9426. <sup>3</sup>             |
| Ba <sub>0.5</sub> Sr <sub>0.5</sub> Co <sub>0.8</sub> Fe <sub>0.2</sub> O <sub>3-<math>\delta</math></sub> | $E_{j=3} - 0.61$ V vs RHE      | $E_{j=10} - 1.73$ V vs RHE      | 1.12 V vs RHE  | 129                                     | <i>Adv. Mater.</i> 2015, 27, 266–271. <sup>4</sup>                      |
| La <sub>0.5</sub> Sr <sub>0.5</sub> Co <sub>0.8</sub> Fe <sub>0.2</sub> O <sub>3</sub>                     | $E_{j=3} - 0.63$ V vs RHE      | $E_{j=10} - 1.82$ V vs RHE      | 1.19 V vs RHE  | -                                       | <i>ChemSusChem</i> 2015, 8, 1058–1065. <sup>5</sup>                     |
| La <sub>0.8</sub> Sr <sub>0.2</sub> Co <sub>1-x</sub> Mn <sub>x</sub> O <sub>3</sub>                       | $E_{j=3} - 0.70$ V vs RHE      | $E_{j=10} - 1.73$ V vs RHE      | 1.03 V vs RHE  | 113                                     | <i>Electrochimica Acta</i> , 254, (2017), 14–24. <sup>6</sup>           |
| LaNi <sub>1-x</sub> Mg <sub>x</sub> O <sub>3</sub>                                                         | $E_{j=3} - 0.71$ V vs RHE      | $E_{j=10} - 1.864$ V vs RHE     | 1.15 vs RHE    | -                                       | <i>Journal of Power Sources</i> , 265, (2014) 91–96. <sup>7</sup>       |
| La <sub>0.8</sub> Sr <sub>0.2</sub> Mn <sub>1-x</sub> Ni <sub>x</sub> O <sub>3</sub>                       | $E_{j=3} - 0.71$ V vs RHE      | $E_{j=10} - 1.87$ V vs RHE      | 1.16 vs RHE    | -                                       | <i>ACS Appl. Mater. Interfaces</i> 2016, 8, 10, 6520–6528. <sup>8</sup> |
| Co-doped LaMnO <sub>3</sub> /N-doped CNT                                                                   | $E_{j=3} - 0.25$ V vs SCE      | $E_{j=11.7} - 0.76$ V vs SCE    | -              | -                                       | <i>Electrochemistry Comm.</i> , 60, 2015, 38–41. <sup>9</sup>           |
| La <sub>1-x</sub> Y <sub>x</sub> MnO <sub>3</sub>                                                          | $E_{onset} - 0.96$ V vs. RHE   | $E_{onset} - 1.65$ V vs. RHE    | -              | -                                       | <i>Energy</i> , 154, 2018, 561–570. <sup>10</sup>                       |
| La <sub>1.7</sub> Sr <sub>0.3</sub> Co <sub>0.5</sub> Ni <sub>0.5</sub> O <sub>4+<math>\delta</math></sub> | $E_{onset} - 0.696$ V vs. RHE  | $E_{j=11.7} - 1.85$ V vs RHE    | -              | -                                       | <i>Applied Surface Science</i> , 2019, 464, 494–501. <sup>11</sup>      |
| Pr <sub>0.5</sub> Ba <sub>0.5</sub> MnCo <sub>0.2</sub> O <sub>3</sub> nanofiber/VC                        | $E_{j=3} \approx 0.70$ vs. RHE | $E_{j=10} \approx 1.83$ vs. RHE | 1.13           | -                                       | <i>ECS Transactions</i> , 2016, 75, 955–964. <sup>12</sup>              |

**Table S8.** The performance of rechargeable liquid Zn–air batteries with various perovskite electrocatalysts.

| Catalyst                                                                                                                                                  | Current density (mA cm <sup>-2</sup> ) | Overpotential (V) | Cyclic stability   | Power Density (mW cm <sup>-2</sup> ) | Reference                                                                      |
|-----------------------------------------------------------------------------------------------------------------------------------------------------------|----------------------------------------|-------------------|--------------------|--------------------------------------|--------------------------------------------------------------------------------|
| LCRO82                                                                                                                                                    | 5                                      | 0.783             | 240 h, 1400 cycles | 139                                  | <b>Our work</b>                                                                |
| Pt/Sr(Co <sub>0.8</sub> Fe <sub>0.2</sub> ) <sub>0.95</sub> Po <sub>0.05</sub> O <sub>3-δ</sub>                                                           | 5                                      | 0.77              | 80 h, 240 cycles   | 122                                  | <i>Advance Energy Materials</i> , 2019, 10, 5, 1903271. <sup>13</sup>          |
| Ba <sub>0.6</sub> Sr <sub>0.4</sub> Co <sub>0.79</sub> Fe <sub>0.21</sub> O <sub>2.67</sub> /Ni <sub>0.6</sub> Fe <sub>0.4</sub> (OH) <sub>x</sub> [NiFe] | 5                                      | 0.89              | 100 cycles         | 52.8                                 | <i>ACS Appl. Mater. Interfaces</i> , 2019, 11, 39, 35853–35862. <sup>14</sup>  |
| LaNiO <sub>3</sub> @FeOOH 1:1                                                                                                                             | 5                                      | 0.86              | 16 h, 90 cycles    | -                                    | <i>Applied Catalysis B: Environmental</i> , 262, (2020), 118291. <sup>15</sup> |
| S-doped-LaCoO <sub>3</sub>                                                                                                                                | 2                                      | 0.95              | 100 h, 300 cycle   | 92                                   | <i>Chem. Mater.</i> 2020, 32, 8, 3439–3446. <sup>16</sup>                      |
| Ce <sub>0.9</sub> Gd <sub>0.1</sub> O <sub>2-δ</sub> /Pr <sub>0.5</sub> Ba <sub>0.5</sub> CoO <sub>3-δ</sub>                                              | 10                                     | 0.98              | 200 h              | 207                                  | <i>Applied Catalysis B: Environmental</i> , 266 (2020) 118656. <sup>17</sup>   |
| La <sub>0.9</sub> MnO <sub>3-δ</sub>                                                                                                                      | 5                                      | 0.80              | 100 cycle          | 170                                  | <i>Electrochimica Acta</i> , 333 (2020) 135566. <sup>18</sup>                  |
| Mg-doped-LaNiO <sub>3</sub>                                                                                                                               | 10                                     | 1.3               | 110 h              | 45                                   | <i>ACS Appl. Energy Mater.</i> 2019, 2, 1, 923–931. <sup>19</sup>              |
| Ba <sub>0.5</sub> Sr <sub>0.5</sub> Co <sub>0.8</sub> Fe <sub>0.2</sub> O <sub>3-δ</sub>                                                                  | 10                                     | -                 | 150 cycles         | 127                                  | <i>ACS Nano</i> 2017, 11, 11, 11594–11601. <sup>20</sup>                       |
| Ag-doped-Sm <sub>0.5</sub> Sr <sub>0.5</sub> CoO <sub>3-δ</sub>                                                                                           | 10                                     | 1.17              | 110 cycles         | 104                                  | <i>Front. Chem.</i> 2019, 7, 524. <sup>21</sup>                                |
| MnO <sub>2</sub> /La <sub>0.7</sub> Sr <sub>0.3</sub> MnO <sub>3</sub>                                                                                    | 10                                     | 0.949             | 100 cycles         | 181.4                                | <i>ACS Appl. Mater. Interfaces.</i> 2019, 11, 25870. <sup>22</sup>             |
| (La <sub>0.8</sub> Sr <sub>0.2</sub> ) <sub>0.95</sub> Mn <sub>0.5</sub> Fe <sub>0.5</sub> O <sub>3</sub>                                                 | 10                                     | 1.0               | 100 cycles         | 105                                  | <i>Electrochimica Acta</i> , 251 (2019) 113406. <sup>23</sup>                  |

## Reference

- 1 Q. Shen, S. Li, G. Yang, B. Sunden and J. Yuan, *Energies*, 2019, **12**, 410.
- 2 Enhancing Electrocatalytic Activity of Perovskite Oxides by Tuning Cation Deficiency for Oxygen Reduction and Evolution Reactions | Chemistry of Materials, <https://pubs.acs.org/doi/abs/10.1021/acs.chemmater.5b04457>, (accessed June 23, 2020).
- 3 D. Zhang, Y. Song, Z. Du, L. Wang, Y. Li and J. B. Goodenough, *Journal of Materials Chemistry A*, 2015, **3**, 9421–9426.
- 4 Fabrication of Ba<sub>0.5</sub>Sr<sub>0.5</sub>Co<sub>0.8</sub>Fe<sub>0.2</sub>O<sub>3-δ</sub> Catalysts with Enhanced Electrochemical Performance by Removing an Inherent Heterogeneous Surface Film Layer - Jung - 2015 - Advanced Materials - Wiley Online Library, <https://onlinelibrary.wiley.com/doi/full/10.1002/adma.201403897>, (accessed June 23, 2020).
- 5 H. W. Park, D. U. Lee, M. G. Park, R. Ahmed, M. H. Seo, L. F. Nazar and Z. Chen, *ChemSusChem*, 2015, **8**, 1058–1065.
- 6 Q. Wang, Y. Xue, S. Sun, S. Li, H. Miao and Z. Liu, *Electrochimica Acta*, 2017, **254**, 14–24.
- 7 Z. Du, P. Yang, L. Wang, Y. Lu, J. B. Goodenough, J. Zhang and D. Zhang, *Journal of Power Sources*, 2014, **265**, 91–96.
- 8 Nickel-Doped La<sub>0.8</sub>Sr<sub>0.2</sub>Mn<sub>1-x</sub>Ni<sub>x</sub>O<sub>3</sub> Nanoparticles Containing Abundant Oxygen Vacancies as an Optimized Bifunctional Catalyst for Oxygen Cathode in Rechargeable Lithium–Air Batteries | ACS Applied Materials & Interfaces, <https://pubs.acs.org/doi/abs/10.1021/acsami.6b00296>, (accessed June 23, 2020).
- 9 D. U. Lee, M. G. Park, H. W. Park, M. H. Seo, V. Ismayilov, R. Ahmed and Z. Chen, *Electrochemistry Communications*, 2015, **60**, 38–41.
- 10 H. Miao, Z. Wang, Q. Wang, S. Sun, Y. Xue, F. Wang, J. Zhao, Z. Liu and J. Yuan, *Energy*, 2018, **154**, 561–570.
- 11 P. Li, B. Wei, Z. Lü, Y. Wu, Y. Zhang and X. Huang, *Applied Surface Science*, 2019, **464**, 494–501.
- 12 Y. Zhang, Y.-F. Sun and J.-L. Luo, *ECS Trans.*, 2016, **75**, 955.
- 13 X. Wang, J. Sunarso, Q. Lu, Z. Zhou, J. Dai, D. Guan, W. Zhou and Z. Shao, *Advanced Energy Materials*, 2020, **10**, 1903271.
- 14 R. Majee, Q. A. Islam and S. Bhattacharyya, *ACS Appl. Mater. Interfaces*, 2019, **11**, 35853–35862.
- 15 Z. Li, L. Lv, X. Ao, J.-G. Li, H. Sun, P. An, X. Xue, Y. Li, M. Liu, C. Wang and M. Liu, *Applied Catalysis B: Environmental*, 2020, **262**, 118291.
- 16 Modulation of Electronics of Oxide Perovskites by Sulfur Doping for Electrocatalysis in Rechargeable Zn–Air Batteries | Chemistry of Materials, <https://pubs.acs.org/doi/abs/10.1021/acs.chemmater.9b05148>, (accessed June 23, 2020).
- 17 L. Gui, Z. Wang, K. Zhang, B. He, Y. Liu, W. Zhou, J. Xu, Q. Wang and L. Zhao, *Applied Catalysis B: Environmental*, 2020, **266**, 118656.
- 18 H. Miao, X. Wu, B. Chen, Q. Wang, F. Wang, J. Wang, C. Zhang, H. Zhang, J. Yuan and Q. Zhang, *Electrochimica Acta*, 2020, **333**, 135566.
- 19 J. Bian, R. Su, Y. Yao, J. Wang, J. Zhou, F. Li, Z. L. Wang and C. Sun, *ACS Appl. Energy Mater.*, 2019, **2**, 923–931.
- 20 Y. Bu, O. Gwon, G. Nam, H. Jang, S. Kim, Q. Zhong, J. Cho and G. Kim, *ACS Nano*, 2017, **11**, 11594–11601.
- 21 Y. Zhang, Y. Guo, T. Liu, F. Feng, C. Wang, H. Hu, M. Wu, M. Ni and Z. Shao, *Front. Chem.*, , DOI:10.3389/fchem.2019.00524.
- 22 S. Yan, Y. Xue, S. Li, G. Shao and Z. Liu, *ACS Appl. Mater. Interfaces*, 2019, **11**, 25870–25881.
- 23 R. Yuan, Y. He, W. He, M. Ni and M. K. H. Leung, *Applied Energy*, 2019, **251**, 113406.
